# Supplementary material for: A turn-on fluorescence sensing strategy for rapid detection of flumequine in water environments using covalent-coordination functionalized MOFs
Source: Royal Society of Chemistry journal article supplement (doi:10.1039/d1ce00668a), 2021-01-01
Supplement: d1ce00668a1.pdf [file d1ce00668a1.pdf]

## Supporting Information

### A turn-on fluorescent sensing strategy for rapid detection of Flumequine in water environment using covalent-coordination functionalized MOFs

Shengnan Li<sup>a</sup>, Ying Li<sup>b,\*</sup>, and Bing Yan<sup>a,\*</sup>

<sup>a</sup> School of Chem. Sci. and Engineering, Tongji University, Siping Road 1239, Shanghai 200092, China.

<sup>b</sup> School of Materials Science and Engineering, Shanghai University of Shanghai for Science and Technology, Jungong Road 516, Shanghai 200093, China

**Fig. S1** Energy dispersive X-ray spectroscopy (EDS) of ZIF-90

**Fig. S2** Energy dispersive X-ray spectroscopy (EDS) of ZIF-90-PA

**Fig. S3** Energy dispersive X-ray spectroscopy (EDS) of Eu@ZIF-90-PA

**Fig. S4** PXRD patterns of Eu@ZIF-90-PA before and after immersing in different solvents for 24 h

**Fig.S5** PXRD patterns of Eu@ZIF-90-PA before and after immersing in different pH values aqueous solutions.

**Fig.S6** Fluorescence excitation and emission spectra of solid-state (a) ICA ligand (b) ZIF-90 at room temperature.

**Fig.S7** Fluorescence excitation and emission spectra of solid-state (a) PA (b) ZIF-90-PA (C) Eu@ZIF-90-PA at room temperature(d) CIE coordinates of Eu@ ZIF-90-PA.

**Fig. S8** Variation of luminescence intensity of Eu@ ZIF-90-PA at 613 nm with immersion time in Flumequine aqueous solutions ( $10^{-2}$  M) ( $\lambda_{\text{ex}} = 349$  nm).

**Fig. S9** Luminescence intensity of Eu@ ZIF-90-PA at 613 nm after three repetitions with  $10^{-2}$ M Flumequine in aqueous solutions ( $\lambda_{\text{ex}} = 349$  nm).

---

\* Corresponding author: Email address: [byan@tongji.edu.cn](mailto:byan@tongji.edu.cn) (Bing Yan)

\* Corresponding author: Email address: [byan@tongji.edu.cn](mailto:byan@tongji.edu.cn) (Bing Yan)

**Fig. S10** PXRD patterns of Eu@ZIF-90-PA before (a) and after (b) immersing in Flumequine aqueous solutions ( $10^{-3}$  M) for 24h

**Fig. S11** Emission intensities of Eu@ ZIF-90-PA at 613 nm upon the addition of Flumequine in the solutions after soaking in solutions of different pH values for 24h

**Scheme S1** The chemical structural formula of Flumequine.

**Fig. S12** Emission decay profiles of  $^5D_0$  in Eu@ ZIF-90-PA solid powder and in aqueous solution (a), Eu@ ZIF-90-PA with  $10^{-2}$  M Flumequine added (b).

**Table S1** The weight percentages of all elements in ZIF-90, ZIF-90-PA and Eu@ZIF-90-PA determined by Energy dispersive analysis by X-rays (EDX).

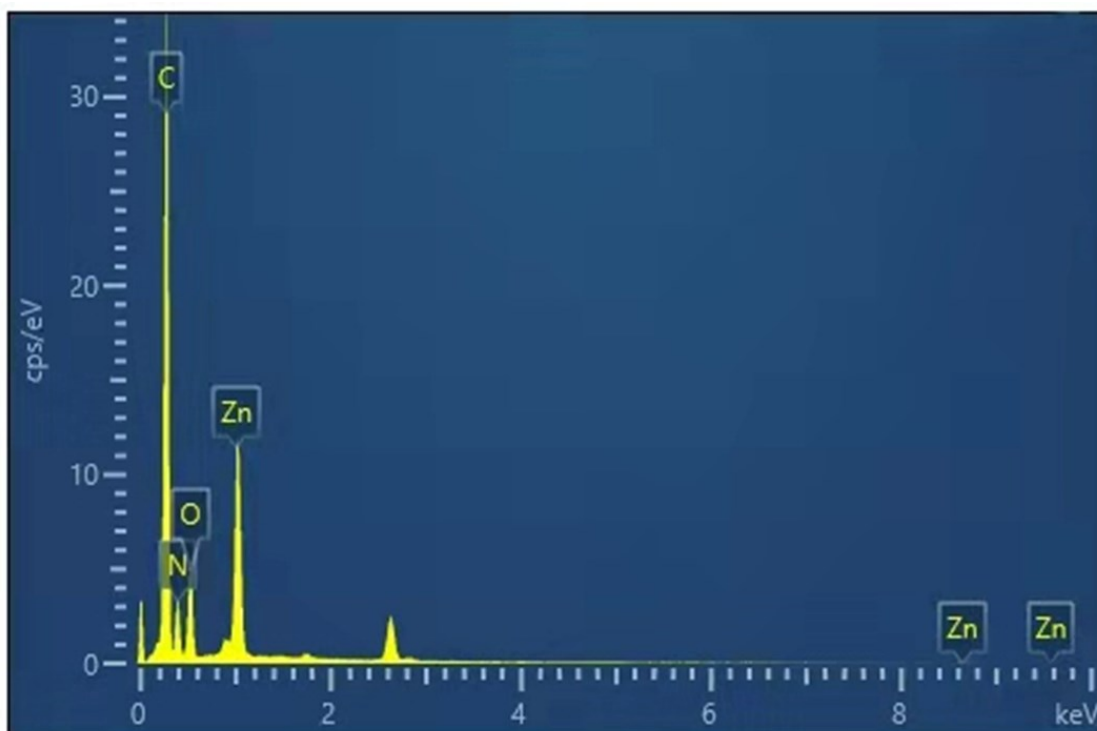

**Fig. S1** Energy dispersive X-ray spectroscopy (EDS) of ZIF-90

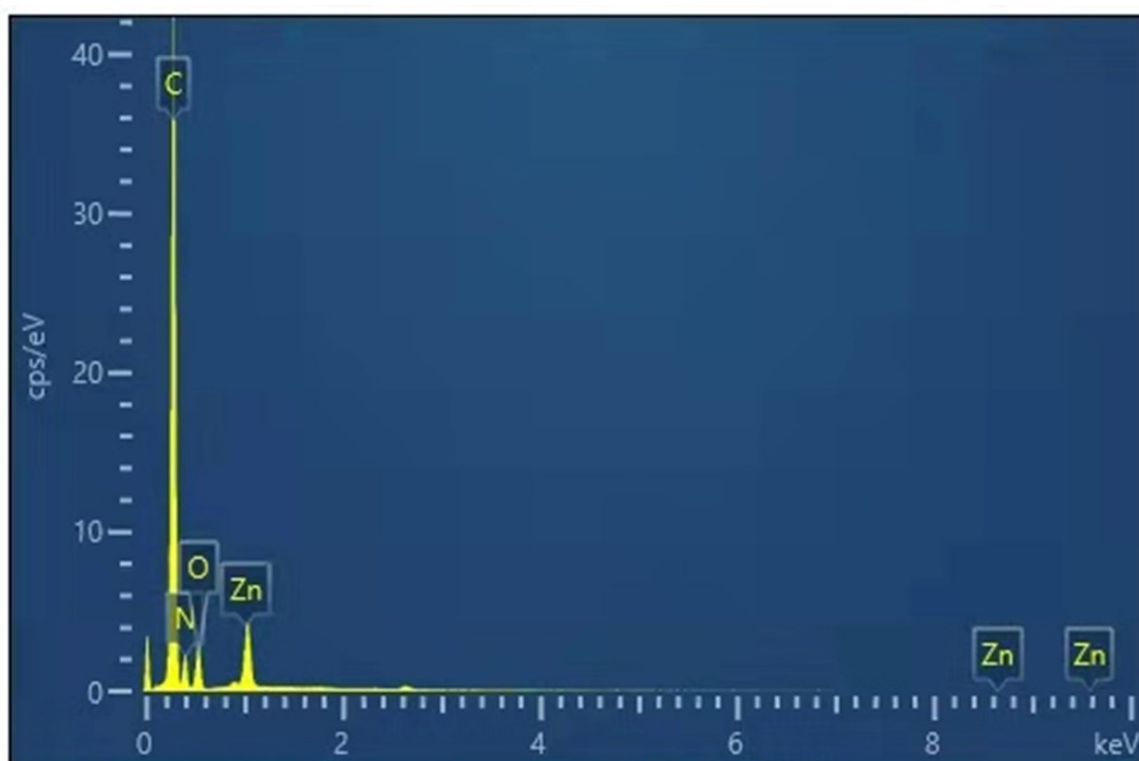

**Fig. S2** Energy dispersive X-ray spectroscopy (EDS) of ZIF-90-PA

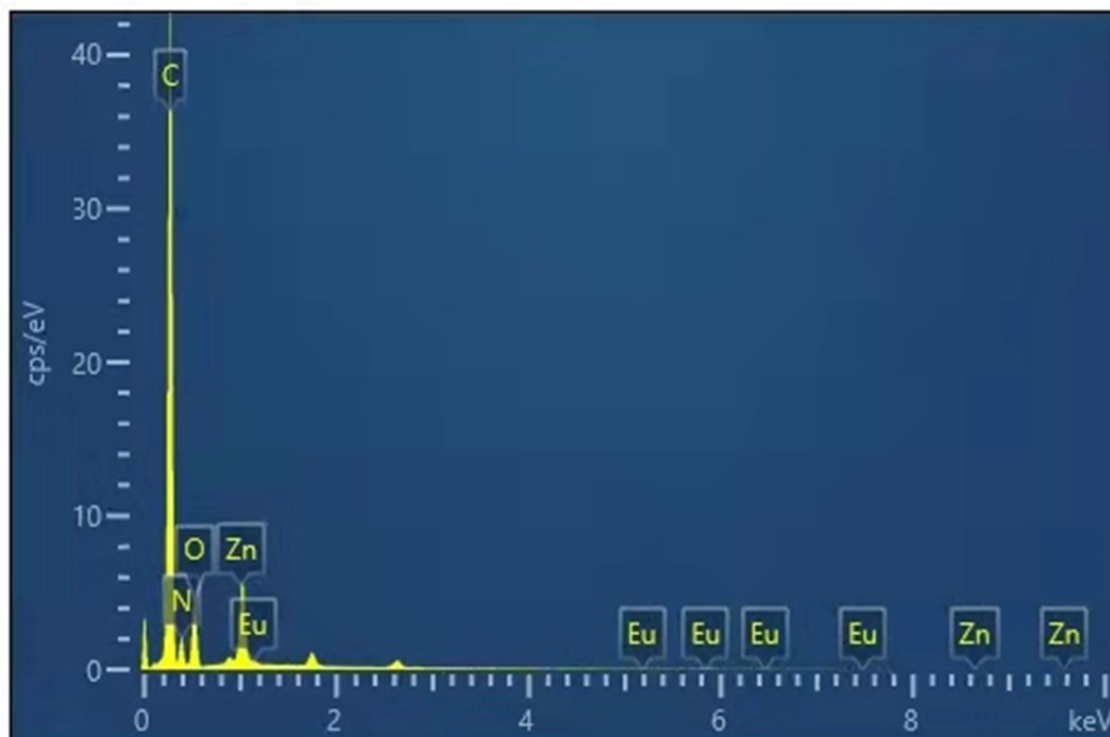

**Fig. S3** Energy dispersive X-ray spectroscopy (EDS) of Eu@ZIF-90-PA

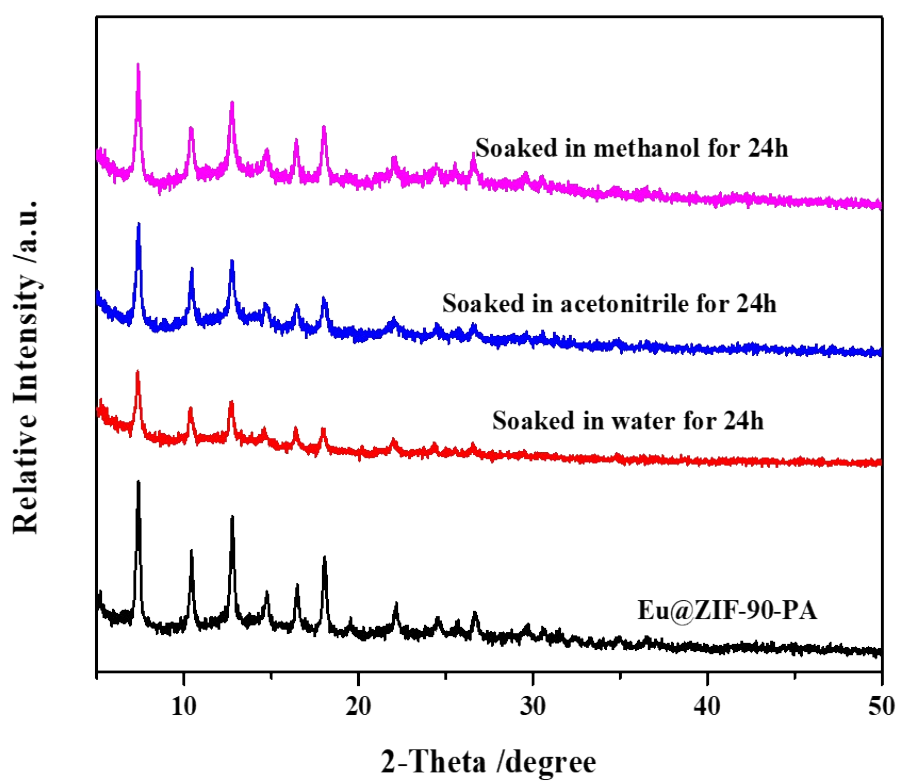

**Fig. S4** PXRD patterns of Eu@ZIF-90-PA before and after immersing in different solvents for 24 h

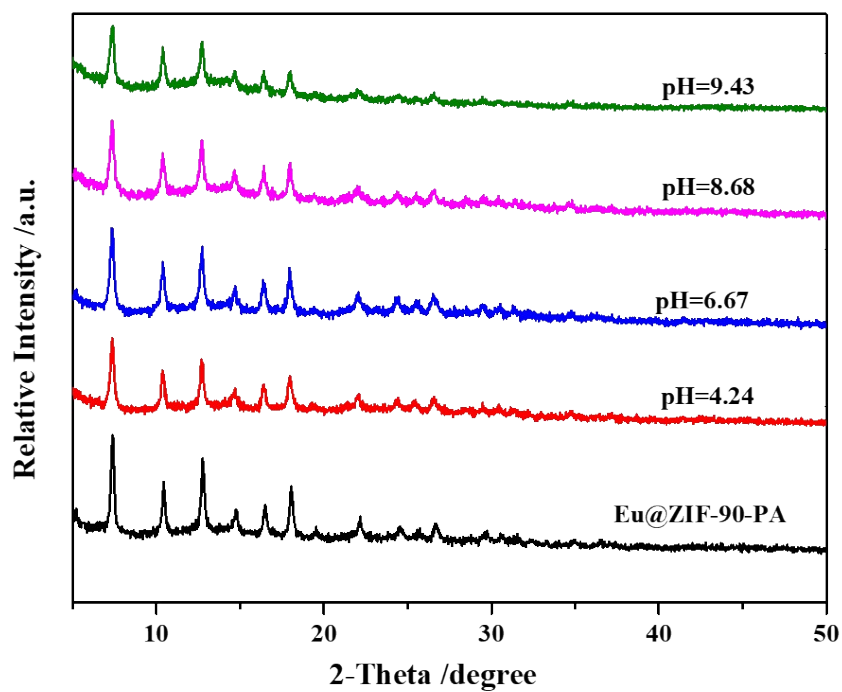

**Fig.S5** XRD patterns of Eu@ZIF-90-PA before and after immersing in different pH values aqueous solutions.

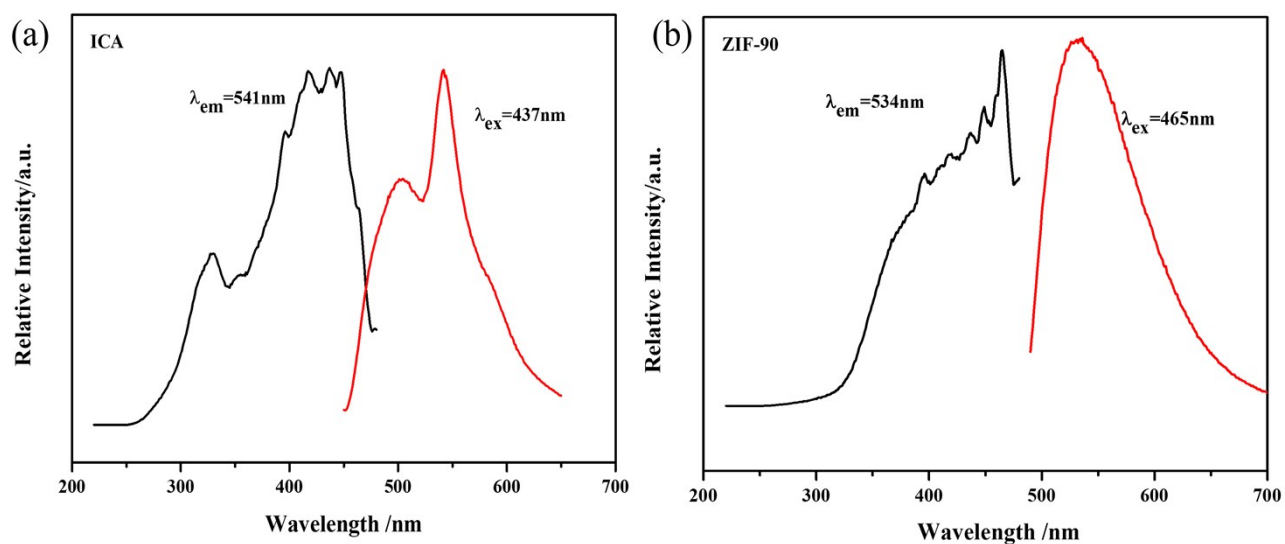

**Fig.S6** Fluorescence excitation and emission spectra of solid-state (a) ICA ligand (b) ZIF-90 at room temperature.

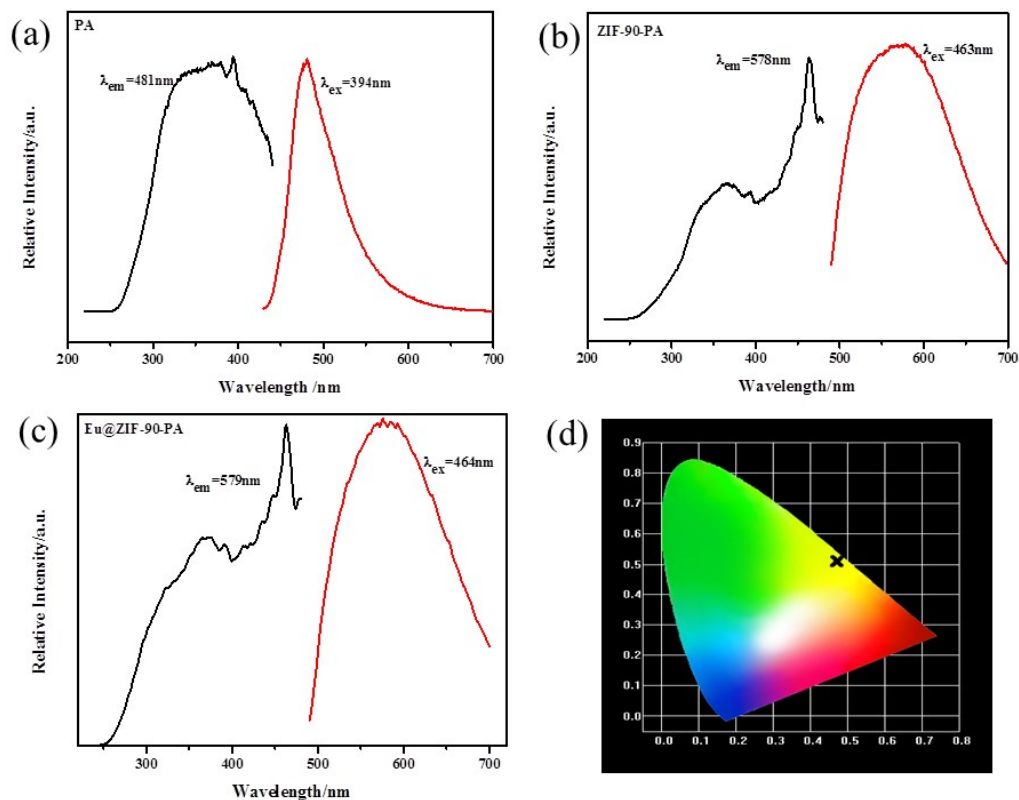

**Fig.S7** Fluorescence excitation and emission spectra of solid-state (a) PA (b) ZIF-90-PA (C) Eu@ZIF-90-PA at room temperature(d) CIE coordinates of Eu@ ZIF-90-PA.

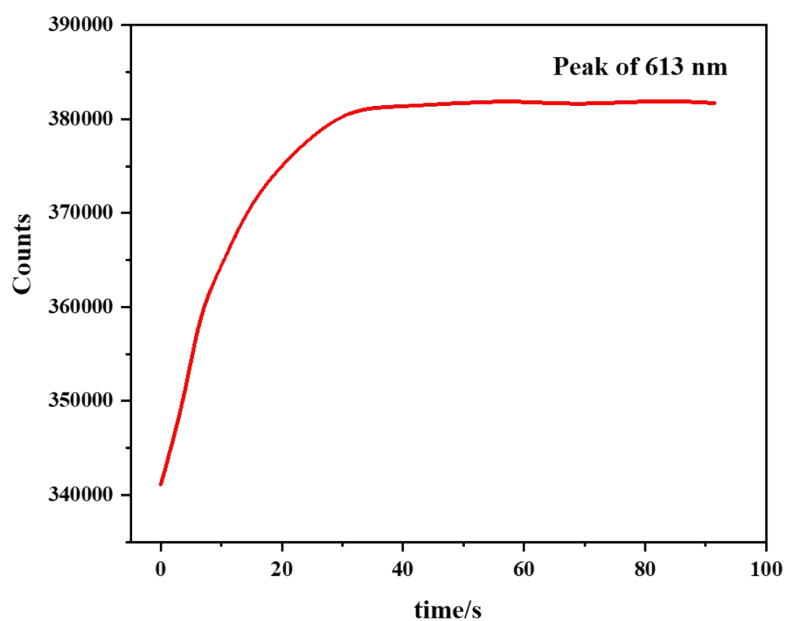

**Fig. S8** Variation of luminescence intensity of Eu@ ZIF-90-PA at 613 nm with immersion time in Flumequine aqueous solutions ( $10^{-2}$  M) ( $\lambda_{ex} = 349$  nm).

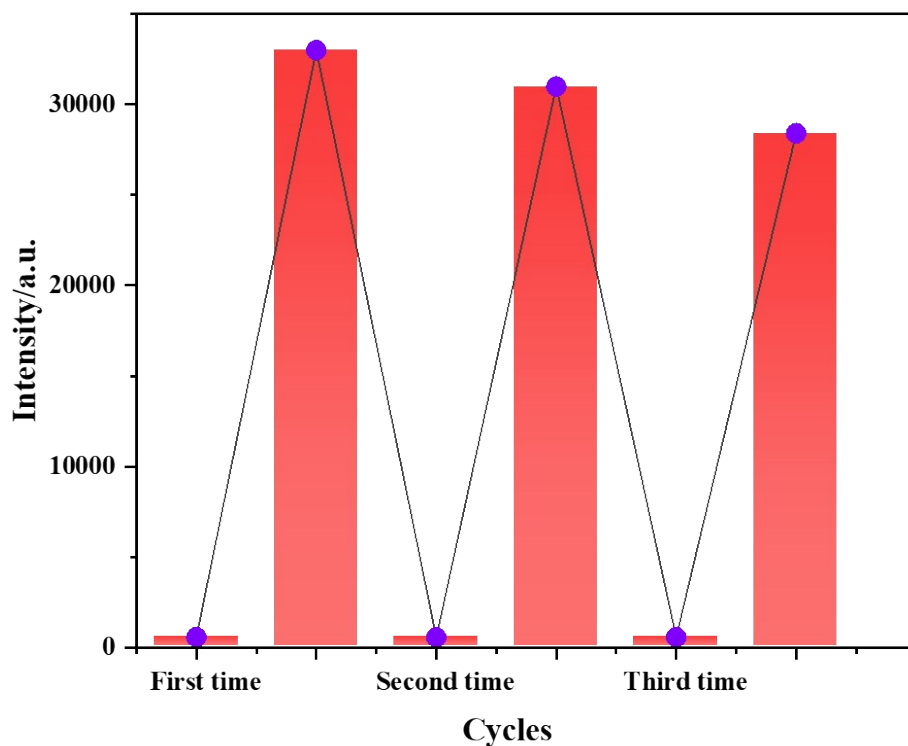

**Fig. S9** Luminescence intensity of Eu@ZIF-90-PA at 613 nm after three repetitions with  $10^{-2}$ M Flumequine in aqueous solutions ( $\lambda_{\text{ex}} = 349$  nm).

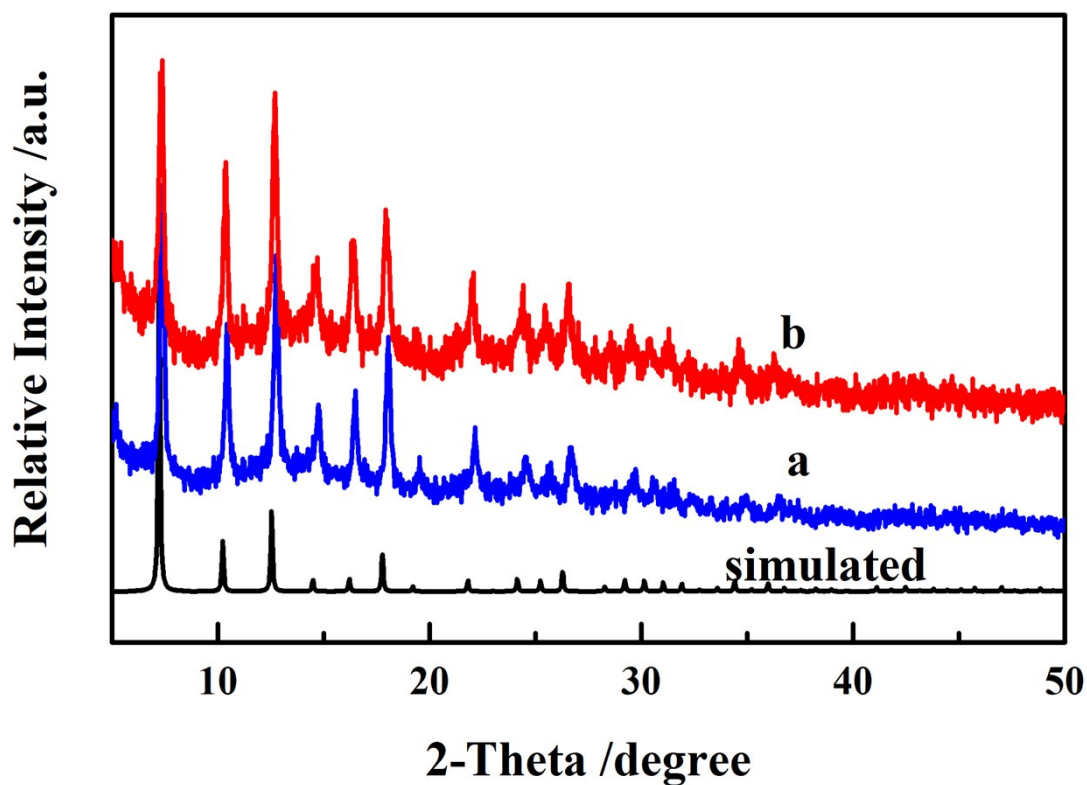

**Fig. S10** PXRD patterns of Eu@ZIF-90-PA before (a) and after (b) immersing in Flumequine aqueous solutions ( $10^{-3}$  M) for 24h

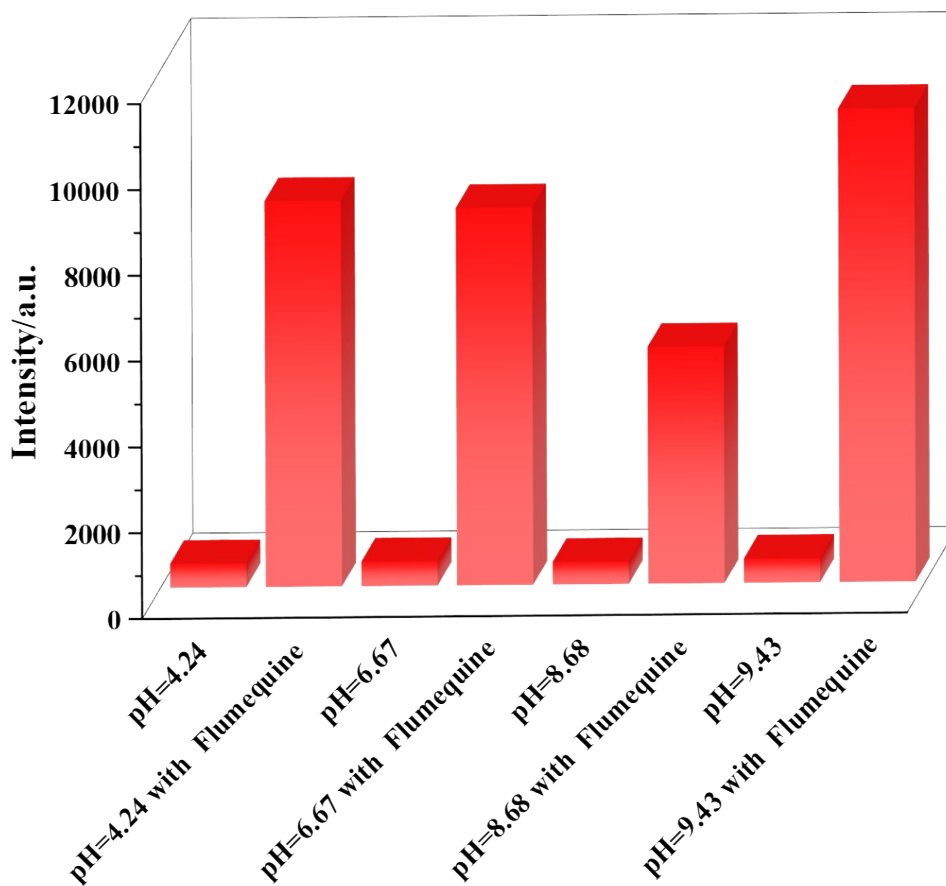

**Fig. S11** Emission intensities of Eu@ ZIF-90-PA at 613 nm upon the addition of Flumequine in the solutions after soaking in solutions of different pH values for 24h

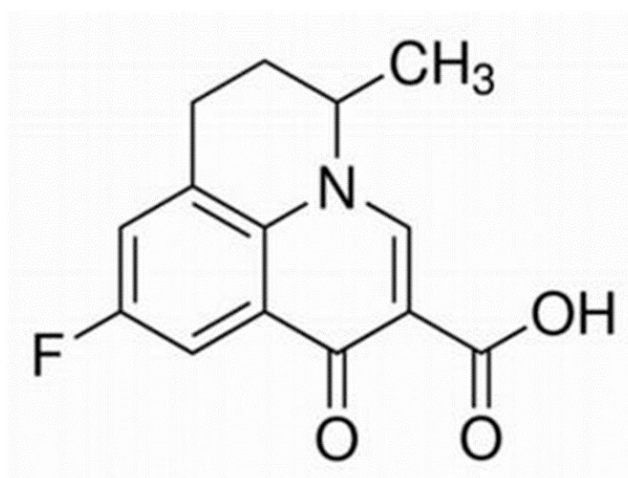

**Scheme S1** The chemical structural formula of Flumequine.



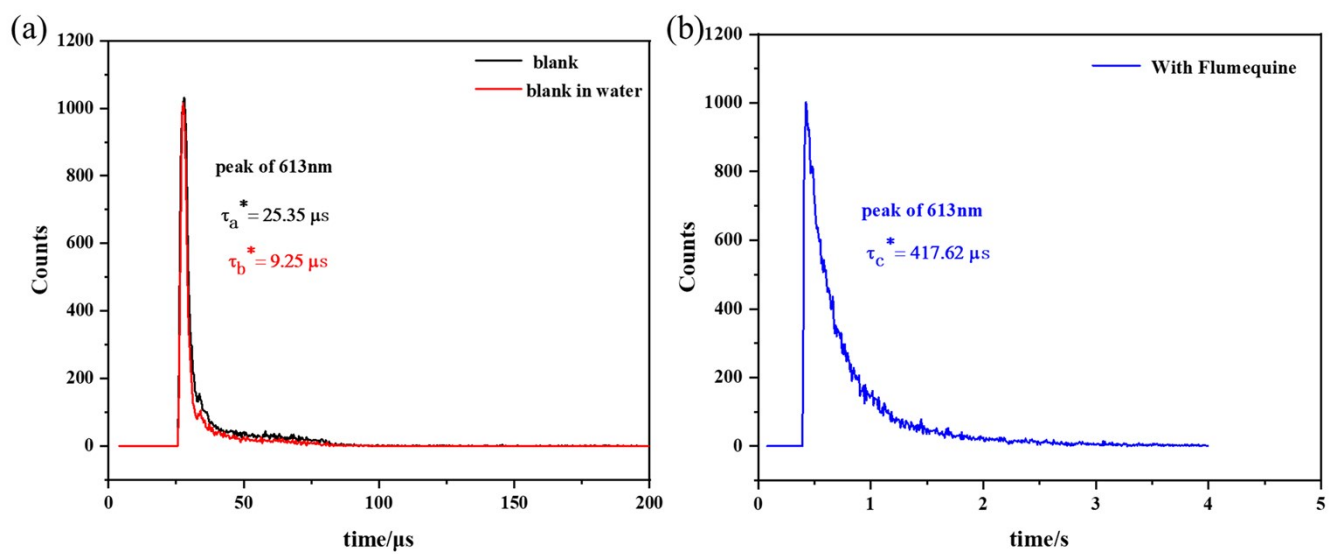

**Fig. S12** Emission decay profiles of  ${}^5D_0$  in Eu@ ZIF-90-PA solid powder and in aqueous solution

(a), Eu@ ZIF-90-PA with  $10^{-2}$  M Flumequine added (b).

**Table S1** The weight percentages of all elements in ZIF-90, ZIF-90-PA and Eu@ZIF-90-PA determined by Energy dispersive analysis by X-rays (EDX).

| Element | Weight percentages/% |           |              |
|---------|----------------------|-----------|--------------|
|         | ZIF-90               | ZIF-90-PA | Eu@ZIF-90-PA |
| C       | 52.91                | 64.57     | 62.32        |
| N       | 16.91                | 17.66     | 13.38        |
| O       | 10.59                | 8.74      | 11.65        |
| Zn      | 19.59                | 9.03      | 10.64        |
| Eu      | -                    | -         | 2.00         |
| Total   | 100                  |           |              |
